# Supplementary material
Source: PubMed Central journal article supplement (PMC3131941)

**A**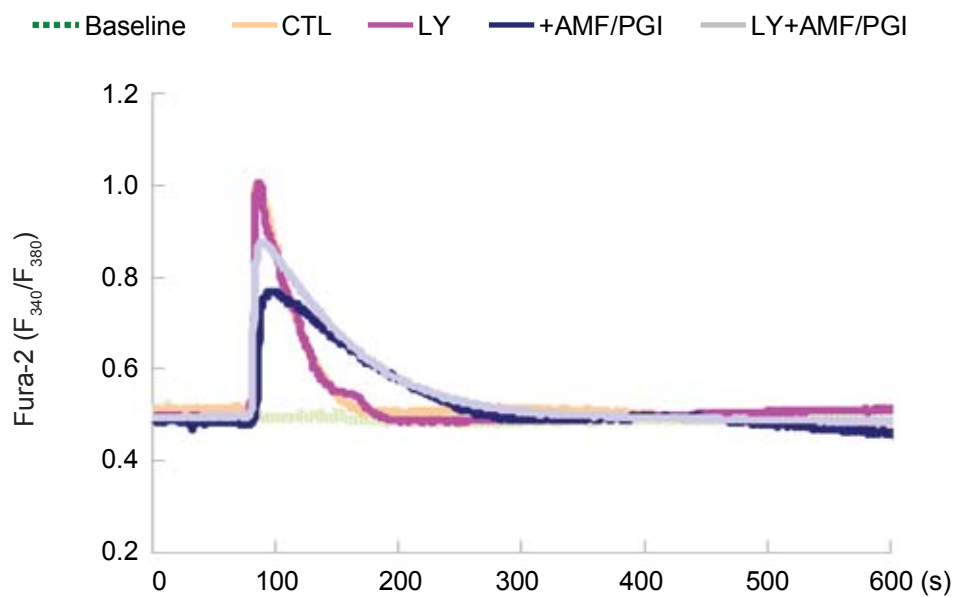**B**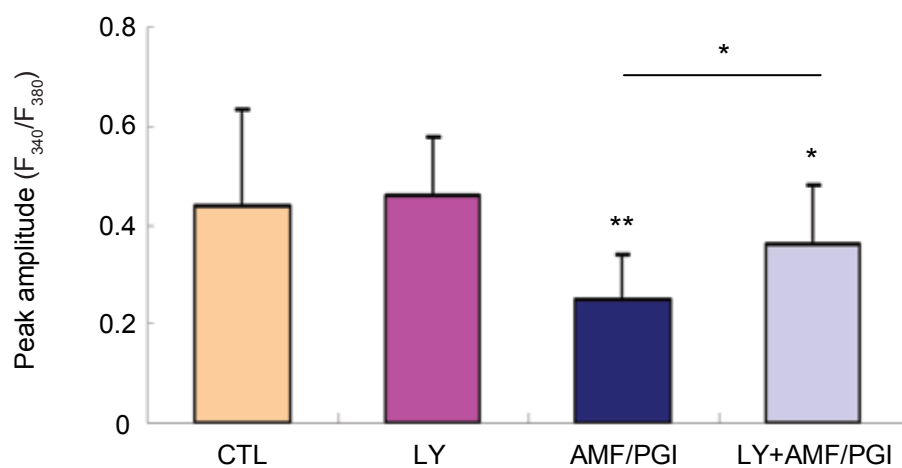**C**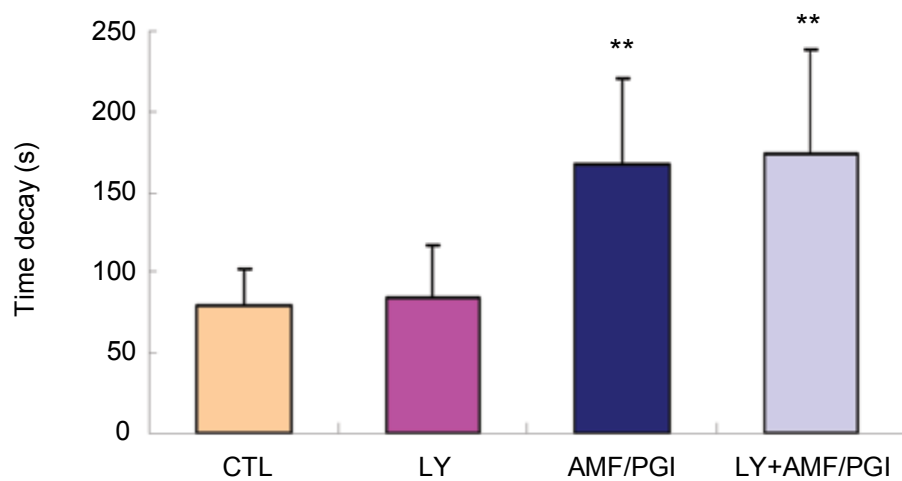

Supplement: cdd2010181x2.pdf [file cdd2010181x2.pdf]
